# Supplementary material for: Adjunctive Cenobamate for Focal-Onset Seizures in Adults: A Systematic Review and Meta-Analysis
Source: Springer Nature journal article supplement (doi:10.1007/s40263-020-00759-9), 2020-08-26
Supplement: MOESM1 [file 24116168]

**Adjunctive Cenobamate for Focal Onset Seizures in Adults:  
A Systematic Review and Meta-Analysis**

Simona Lattanzi<sup>1</sup>, Eugen Trinka<sup>2-4</sup>, Gaetano Zaccara<sup>5</sup>, Pasquale Striano<sup>6</sup>,  
Cinzia Del Giovane<sup>7</sup>, Mauro Silvestrini<sup>1</sup> Francesco Brigo<sup>8,9</sup>

<sup>1</sup>Neurological Clinic, Department of Experimental and Clinical Medicine, Marche Polytechnic University, Via Conca 71, 60020 Ancona, Italy.

<sup>2</sup>Department of Neurology, Christian Doppler Klinik, Paracelsus Medical University, Salzburg, Austria.

<sup>3</sup>Center for Cognitive Neuroscience, Salzburg, Austria.

<sup>4</sup>Public Health, Health Services Research and HTA, University for Health Sciences, Medical Informatics and Technology, Hall i.T, Austria.

<sup>5</sup>Health Agency of Tuscany, Florence, Italy.

<sup>6</sup>Pediatric Neurology and Muscular Diseases Unit, Department of Neurosciences, Rehabilitation, Ophthalmology, Genetics, Maternal and Child Health, "G. Gaslini" Institute, University of Genoa, Genova, Italy.

<sup>7</sup>Institute of Primary Health Care (BIHAM), University of Bern, Bern, Switzerland.

<sup>8</sup>Department of Neuroscience, Biomedicine and Movement Science, University of Verona, Italy

<sup>9</sup>Division of Neurology, "Franz Tappeiner" Hospital, Merano (BZ), Italy.

Correspondence to: Simona Lattanzi, Neurological Clinic, Department of Experimental and Clinical Medicine, Marche Polytechnic University, Ancona, Italy; e-mail: [alfierelattanzisimona@gmail.com](mailto:alfierelattanzisimona@gmail.com)

**p3 e-Appendix I: Search strategy**

**p4: e-Reference**

### **PubMed search strategy**

The strategy was based on the Cochrane Highly Sensitive Search Strategy for identifying randomized trials.<sup>e-1</sup>

- #1 random\* OR placebo OR trial\* OR group\* [Title/Abstract]
- #2 "Randomized Controlled Trial"[Publication Type]
- #3 "Controlled Clinical Trial"[Publication Type]
- #4 ((#1) OR #2) OR #3
- #5 "Animals"[Mesh] NOT "Humans"[Mesh]
- #6 #4 NOT #5
- #7 (cenobamate OR YKP3089) [Title/Abstract]
- #8 epilep\* OR seizure [Title/Abstract]
- #9 #7 AND #8
- #10 #6 AND #9

### **CENTRAL search strategy**

(cenobamate OR YKP3089) AND (epilep\* OR seizure) in Title, Abstract, Keywords in Trials'

### **ClinicalTrials.gov search strategy**

(cenobamate OR YKP3089) AND (epilepsy OR seizure) | Interventional Studies

## **e-Reference**

e-1 Lefebvre C, Manheimer E, Glanville J. Chapter 6: Searching for studies. In: Higgins JPT, Green S (editors). *Cochrane Handbook for Systematic Reviews of Interventions Version 5.0.2* (updated September 2009). The Cochrane Collaboration, 2009. Available from [www.cochranehandbook.org](http://www.cochranehandbook.org).
